# Supplementary material for: Australian Consumers’ Awareness and Acceptance of Insects as Food
Source: Insects. 2018 Apr 19;9(2):44. doi: 10.3390/insects9020044 (PMC6023301; doi:10.3390/insects9020044)
Supplement: Supplementary file 1 [file insects-09-00044-s001.pdf]

**Table S1.** Awareness and consumption of edible insects by consumers segmented according to their sex, age, ethnicity and protein (meat) consumption.

|                                                                    | <b>female<br/>consumers<br/>n = 368</b> | <b>male<br/>consumers<br/>n = 452</b> | <b>younger<br/>consumers<br/>(&lt;35 years)<br/>n = 250</b> | <b>older<br/>consumers<br/>(≥55 years)<br/>n = 205</b> | <b>Australian/<br/>New Zealand<br/>consumers<br/>n = 651</b> | <b>English/Irish/<br/>Scottish<br/>consumers<br/>n = 85</b> | <b>European<br/>consumers<br/>n = 62</b> | <b>Asian<br/>consumers<br/>n = 86</b> | <b>meat-eating<br/>consumers<br/>n = 808</b> | <b>non-meat<br/>eating<br/>consumers<sup>1</sup><br/>n = 12</b> |
|--------------------------------------------------------------------|-----------------------------------------|---------------------------------------|-------------------------------------------------------------|--------------------------------------------------------|--------------------------------------------------------------|-------------------------------------------------------------|------------------------------------------|---------------------------------------|----------------------------------------------|-----------------------------------------------------------------|
| <i>Have you previously heard of entomophagy or edible insects?</i> |                                         |                                       |                                                             |                                                        |                                                              |                                                             |                                          |                                       |                                              |                                                                 |
| yes                                                                | 68                                      | 68                                    | 69                                                          | 67                                                     | 70                                                           | 62                                                          | 68                                       | 70                                    | 68                                           | 58                                                              |
| no                                                                 | 32                                      | 32                                    | 31                                                          | 33                                                     | 30                                                           | 38                                                          | 32                                       | 30                                    | 32                                           | 42                                                              |
| <i>Have you previously consumed edible insects?</i>                |                                         |                                       |                                                             |                                                        |                                                              |                                                             |                                          |                                       |                                              |                                                                 |
| yes                                                                | 13                                      | 27                                    | 20                                                          | 22                                                     | 20                                                           | 19                                                          | 15                                       | 30                                    | 21                                           | 17                                                              |
| no                                                                 | 87                                      | 73                                    | 80                                                          | 78                                                     | 80                                                           | 81                                                          | 85                                       | 70                                    | 79                                           | 83                                                              |

Data are presented as percentages. <sup>1</sup> Consumers who indicated they did not consume animal-based proteins.

**Table S2.** Willingness of different consumer segments to try eating insects and insect-based products.

|                                                                        | <b>female<br/>consumers<br/>n = 368</b> | <b>male<br/>consumers<br/>n = 452</b> | <b>younger<br/>consumers<br/>(&lt;35 years)<br/>n = 250</b> | <b>older<br/>consumers<br/>(≥55 years)<br/>n = 205</b> | <b>Australian/<br/>New Zealand<br/>consumers<br/>n = 651</b> | <b>English/Irish/<br/>Scottish<br/>consumers<br/>n = 85</b> | <b>European<br/>consumers<br/>n = 62</b> | <b>Asian<br/>consumers<br/>n = 86</b> | <b>meat-eating<br/>consumers<br/>n = 808</b> | <b>non-meat<br/>eating<br/>consumers<sup>1</sup><br/>n = 12</b> |
|------------------------------------------------------------------------|-----------------------------------------|---------------------------------------|-------------------------------------------------------------|--------------------------------------------------------|--------------------------------------------------------------|-------------------------------------------------------------|------------------------------------------|---------------------------------------|----------------------------------------------|-----------------------------------------------------------------|
| <i>If you had the opportunity, how likely would you be to try a...</i> |                                         |                                       |                                                             |                                                        |                                                              |                                                             |                                          |                                       |                                              |                                                                 |
| mealworm                                                               | 2.40                                    | 2.93                                  | 2.57                                                        | 2.55                                                   | 2.73                                                         | 2.57                                                        | 2.35                                     | 2.62                                  | 2.70                                         | 2.15                                                            |
| cricket                                                                | 2.64                                    | 3.30                                  | 3.03                                                        | 3.18                                                   | 3.00                                                         | 2.76                                                        | 2.65                                     | 3.24                                  | 3.01                                         | 2.31                                                            |
| ant                                                                    | 2.66                                    | 3.29                                  | 3.03                                                        | 3.21                                                   | 3.02                                                         | 2.70                                                        | 2.68                                     | 3.34                                  | 3.02                                         | 2.31                                                            |
| cockroach                                                              | 1.80                                    | 2.32                                  | 2.21                                                        | 2.10                                                   | 2.08                                                         | 1.95                                                        | 1.90                                     | 2.25                                  | 2.09                                         | 1.92                                                            |
| witchetty grub                                                         | 2.50                                    | 3.37                                  | 2.70                                                        | 3.34                                                   | 3.04                                                         | 2.80                                                        | 2.59                                     | 2.67                                  | 2.99                                         | 2.08                                                            |
| scorpion                                                               | 2.02                                    | 2.83                                  | 2.57                                                        | 2.54                                                   | 2.42                                                         | 2.30                                                        | 2.37                                     | 2.88                                  | 2.47                                         | 2.00                                                            |
| spider                                                                 | 1.76                                    | 2.51                                  | 2.17                                                        | 2.26                                                   | 2.14                                                         | 2.01                                                        | 1.97                                     | 2.43                                  | 2.18                                         | 1.92                                                            |
| flavored insect                                                        | 2.92                                    | 3.58                                  | 3.24                                                        | 3.52                                                   | 3.31                                                         | 3.12                                                        | 2.83                                     | 3.36                                  | 3.30                                         | 2.00                                                            |
| chocolate-coated insect                                                | 2.75                                    | 3.25                                  | 3.04                                                        | 3.21                                                   | 3.06                                                         | 2.83                                                        | 2.57                                     | 2.91                                  | 3.04                                         | 2.00                                                            |
| biscuit made with insect flour                                         | 3.68                                    | 4.09                                  | 3.76                                                        | 4.21                                                   | 3.94                                                         | 3.96                                                        | 3.37                                     | 3.76                                  | 3.93                                         | 2.31                                                            |
| cooked meal made with insects                                          | 3.26                                    | 3.81                                  | 3.45                                                        | 3.82                                                   | 3.58                                                         | 3.58                                                        | 3.16                                     | 3.60                                  | 3.58                                         | 2.15                                                            |

Data are presented as percentages. <sup>1</sup> Consumers who indicated they did not consume animal-based proteins.

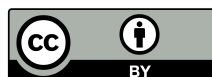

© 2018 by the authors. Submitted for possible open access publication under the terms and conditions of the Creative Commons Attribution (CC-BY) license (<http://creativecommons.org/licenses/by/4.0/>).
